# Supplementary material for: Molecular Determinants and Specificity of mRNA with Alternatively-Spliced UPF1 Isoforms, Influenced by an Insertion in the ‘Regulatory Loop’
Source: MDPI journal article supplement (doi:10.3390/ijms222312744), 2021-11-25
Supplement: s1 [file s1]

# **Molecular determinants and specificity of mRNA with alternatively-spliced UPF1 isoforms, influenced by an insertion in the ‘regulatory loop’**

Monikaben Padariya<sup>1</sup>, Robin Fahraeus<sup>1,2,3,4</sup>, Ted Hupp<sup>1,5\*</sup> and Umesh Kalathiya<sup>1\*</sup>

<sup>1</sup>International Centre for Cancer Vaccine Science, University of Gdansk, ul. Kładki 24, 80-822 Gdansk, Poland

<sup>2</sup>Inserm UMRS1131, Institut de Génétique Moléculaire, Université Paris 7, Hôpital St. Louis, F-75010 Paris, France

<sup>3</sup>Department of Medical Biosciences, Building 6M, Umeå University, 901 85 Umeå, Sweden

<sup>4</sup>RECAMO, Masaryk Memorial Cancer Institute, Zlutykopec 7, 65653 Brno, Czech Republic

<sup>5</sup>Institute of Genetics and Cancer, University of Edinburgh, Edinburgh, Scotland EH4 2XR, UK

\*Correspondence: ted.hupp@ed.ac.uk (T.H), umesh.kalathiya@ug.edu.pl (U.K)

## **Supporting Materials**

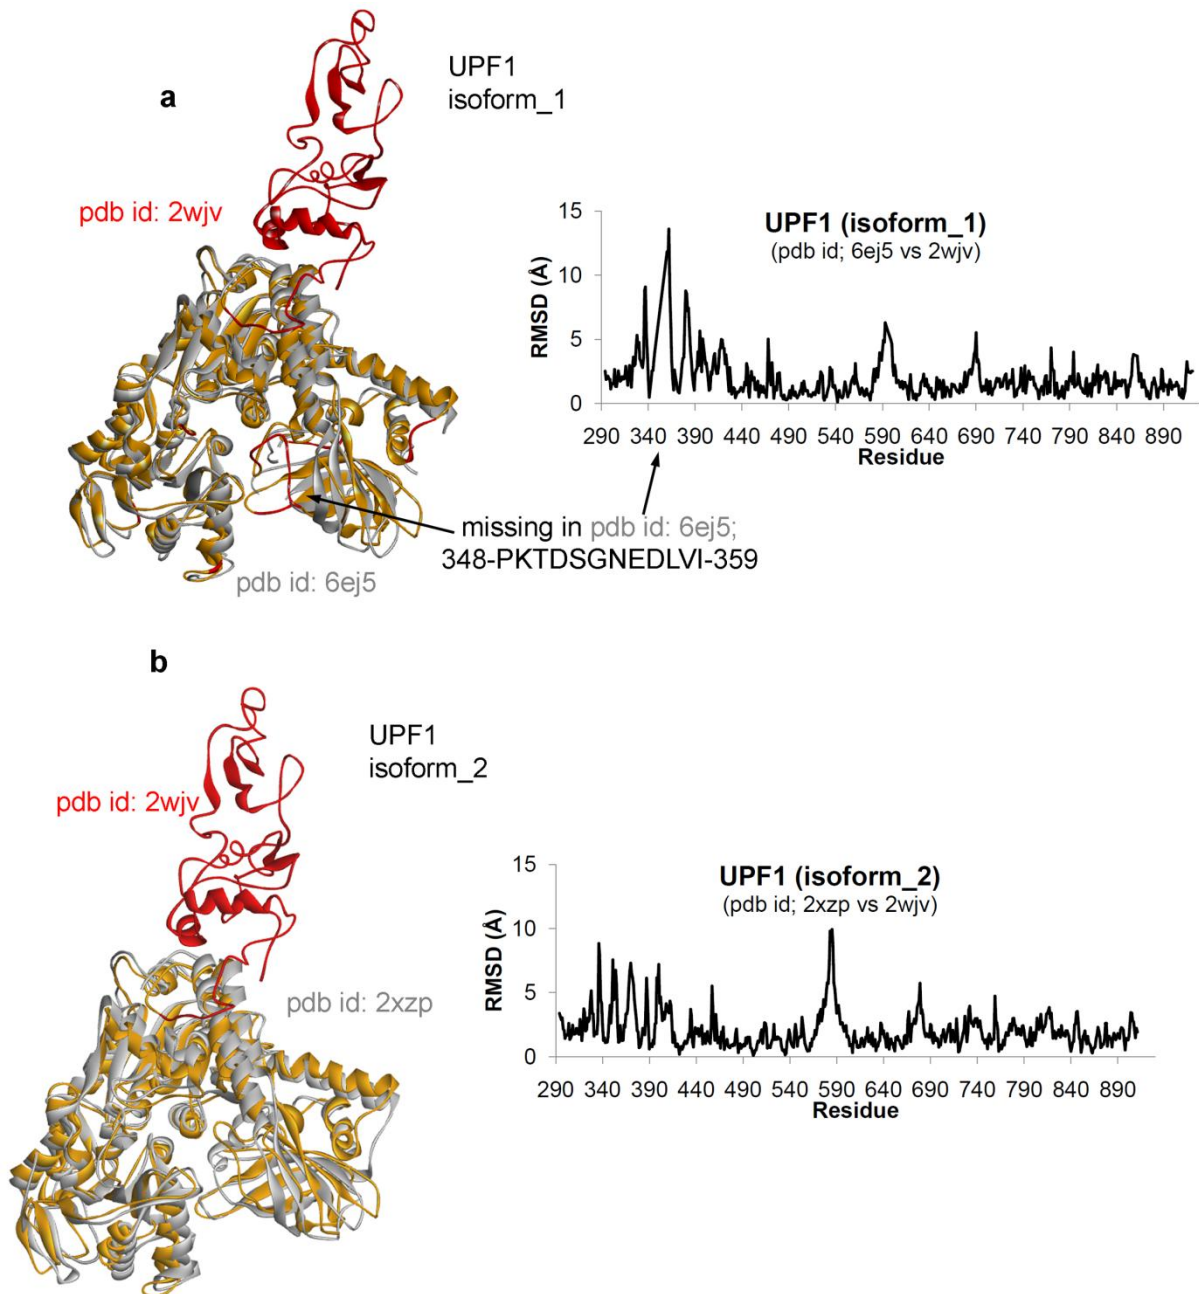

**Figure S1.** The modeled isoform structures of the UPF1 protein investigated in this study, superimposed with different available structures in the Protein Data Bank database (<http://www.rcsb.org/pdb>). **(a)** UPF1 isoform\_1 modeled structures (pdb id: 2wjv) compared with pdb id. 6ej5, the missing residues in the structure pdb id. 6ej5 and are available in our modeled structure (pdb id: 2wjv) are marked red. Right panel represents the RMSD computed from both structures when superimposing over each other. Higher flexibility in the initial region is seen due to missing 'regulatory loop' residues 348-PKTDSGNEDLVI-359 in the structure; pdb id. 6ej5. **(b)** UPF1 isoform\_2 modeled structures (pdb id. 2wjv) vs. (pdb id. 2xzp), the missing CH-

domain in the pdb id: 2xzp is marked in red color. Right panel represents the RMSD computed from both structures, when superimposing each other.

**Table S1.** Different GC-rich mRNA motifs make long lasting hydrogen bond interactions with the UPF1 isoform\_1 protein during 100 ns MD simulations. The H-bond interactions with occupancy  $\geq 10\%$  are presented in this table.

| 5'CCUGAGA3' |      |            | 5'CCUGGAA3' |      |            | 5'CCUGGGA3' |      |            | 5'CCUGGGG3' |      |            |
|-------------|------|------------|-------------|------|------------|-------------|------|------------|-------------|------|------------|
| UPF1        | mRNA | Occup. (%) |
| Gly862      | C1   | 68.06      | Asn535      | A5   | 76.15      | Asp364      | G4   | 47.70      | Val629      | G5   | 76.15      |
| Asp364      | A4   | 62.18      | Arg363      | G3   | 70.76      | Arg366      | A6   | 41.52      | Arg366      | G6   | 38.82      |
| Arg363      | U2   | 56.19      | Met365      | G4   | 58.78      | Arg363      | G3   | 39.42      | Asn865      | C1   | 34.13      |
| Thr627      | A6   | 51.30      | Gly862      | U2   | 56.89      | Arg366      | G4   | 37.92      | Glu313      | G3   | 16.77      |
| Lys321      | A6   | 26.85      | Asn535      | A6   | 51.80      | Met365      | G4   | 31.24      | Ser559      | G6   | 13.37      |
| Asp317      | A6   | 22.55      | Thr627      | A6   | 48.30      | Asp371      | A6   | 30.64      | Arg869      | U2   | 11.98      |
| Glu656      | G5   | 21.76      | Asn535      | A5   | 46.31      | Val681      | G3   | 25.25      | Thr429      | G6   | 10.38      |
| Ile359      | U2   | 17.96      | Asp364      | G4   | 40.42      | Gln651      | G5   | 21.06      |             |      |            |
| Ser559      | A6   | 16.37      | Arg869      | C1   | 38.52      | Ser836      | G3   | 19.86      |             |      |            |
| Asn535      | A6   | 14.47      | Arg366      | A6   | 38.02      | Lys684      | C1   | 19.06      |             |      |            |
| Ser534      | A6   | 12.77      | Ser430      | A5   | 29.54      | Gly862      | U2   | 18.76      |             |      |            |
| Arg366      | G5   | 12.57      | Ser534      | G4   | 28.94      | Glu656      | G5   | 18.66      |             |      |            |
|             |      |            | Pro679      | C1   | 26.45      | Asn865      | C0   | 18.26      |             |      |            |
|             |      |            | Arg366      | A6   | 20.56      | Ser559      | A6   | 17.76      |             |      |            |
|             |      |            | Arg560      | A6   | 17.17      | Gly862      | C1   | 17.66      |             |      |            |
|             |      |            | Ser836      | G3   | 16.77      | Asp866      | C0   | 17.66      |             |      |            |
|             |      |            | Arg366      | A5   | 15.77      | Arg363      | G4   | 15.47      |             |      |            |
|             |      |            | Asn354      | G3   | 15.57      | Val681      | U2   | 12.18      |             |      |            |
|             |      |            | Ser559      | A6   | 12.77      | Asn535      | G5   | 12.18      |             |      |            |
|             |      |            | Arg868      | C1   | 12.18      | Asn865      | C0   | 10.98      |             |      |            |
|             |      |            | Ser352      | G3   | 11.38      | Asn535      | A6   | 10.88      |             |      |            |
|             |      |            | Val680      | G3   | 10.78%     |             |      |            |             |      |            |

**Table S2.** Different AU-rich mRNA motifs form a long lasting hydrogen bond interactions with the UPF1 isoform\_1 protein during 100 ns MD simulation. The H-bond interactions with occupancy  $\geq 10\%$  are presented in this table.

| 5'UUUUUUU3' |      |            | 5'UUAAUUU3' |      |            | 5'UUGAUUU3' |      |            | 5'UUAGUUU3' |      |            |
|-------------|------|------------|-------------|------|------------|-------------|------|------------|-------------|------|------------|
| UPF1        | mRNA | Occup. (%) |
| Asn535      | U5   | 70.46      | Ile359      | A3   | 76.25      | Asn535      | U6   | 76.05      | Thr627      | U6   | 64.17      |
| Arg363      | U3   | 68.16      | Asn535      | U6   | 52.50      | Arg363      | A4   | 53.49      | Ala557      | U7   | 55.79      |
| Thr627      | U6   | 66.57      | Thr627      | U6   | 51.50      | Asp364      | U5   | 51.50      | Gly862      | U2   | 42.81      |
| Asn535      | U6   | 56.29      | Asp371      | U6   | 49.10      | Ser559      | U7   | 43.81      | Arg554      | U7   | 39.82      |
| Arg366      | U4   | 54.29      | Arg433      | U7   | 46.61      | Asn535      | U6   | 40.62      | Glu313      | G4   | 38.72      |
| Glu656      | U5   | 51.60      | Arg869      | A3   | 46.31      | Ala557      | U7   | 37.92      | Thr627      | U7   | 38.32      |
| Arg433      | U7   | 50.40      | Asn535      | U5   | 46.01      | Cys625      | U7   | 36.53      | Thr627      | U7   | 35.33      |
| Met365      | U3   | 48.50      | Leu357      | U2   | 45.61      | Leu357      | G3   | 34.13      | Asp371      | U6   | 23.65      |
| Asn354      | U2   | 45.41      | Glu355      | U2   | 40.02      | Thr627      | U6   | 33.53      | Asn535      | U6   | 23.35      |
| Thr627      | U7   | 43.51      | Met368      | U6   | 36.73      | Met365      | U5   | 30.54      | Arg869      | U2   | 21.86      |
| Ser352      | U3   | 43.31      | Met365      | U5   | 32.73      | Tyr316      | G3   | 25.55      | Ser534      | U6   | 21.36      |
| Asp364      | U4   | 40.22      | Gly630      | U7   | 32.24      | Asn535      | U7   | 22.26      | Ser430      | U5   | 18.86      |
| Lys558      | U7   | 37.23      | Val681      | U1   | 26.15      | Arg554      | U7   | 21.56      | Ser534      | U5   | 17.86      |
| Asp633      | U7   | 36.43      | Asn535      | U5   | 23.35      | Gly630      | U7   | 20.06      | Ser559      | U6   | 16.97      |
| Lys427      | U7   | 35.93      | Asp633      | U7   | 21.16      | Gln651      | U5   | 19.46      | Ser836      | A3   | 12.97      |
| Asn535      | U5   | 24.05      | Arg869      | U2   | 21.06      | Glu656      | U5   | 17.17      | Arg363      | G4   | 11.98      |
| Asn865      | U1   | 21.06      | Gly862      | U2   | 18.56      | Leu555      | U7   | 13.47      | Arg366      | U5   | 11.28      |
| Thr429      | U7   | 17.37      | Cys625      | U7   | 17.37      | Val680      | U5   | 12.97      |             |      |            |
| Glu355      | U1   | 14.87      | Asp866      | U1   | 14.47      | Ile359      | G3   | 12.48      |             |      |            |
| Lys684      | U2   | 12.67      | Arg366      | U5   | 14.47      | Asn354      | G3   | 12.38      |             |      |            |
| Asp866      | U1   | 12.57      | Gln651      | A4   | 14.27      | Ser430      | U6   | 11.88      |             |      |            |
| Met368      | U6   | 12.48      | Ser430      | U5   | 12.77      |             |      |            |             |      |            |
| Gly862      | U2   | 10.48      | Glu313      | A4   | 11.98      |             |      |            |             |      |            |
|             |      |            | Ser534      | A4   | 11.38      |             |      |            |             |      |            |

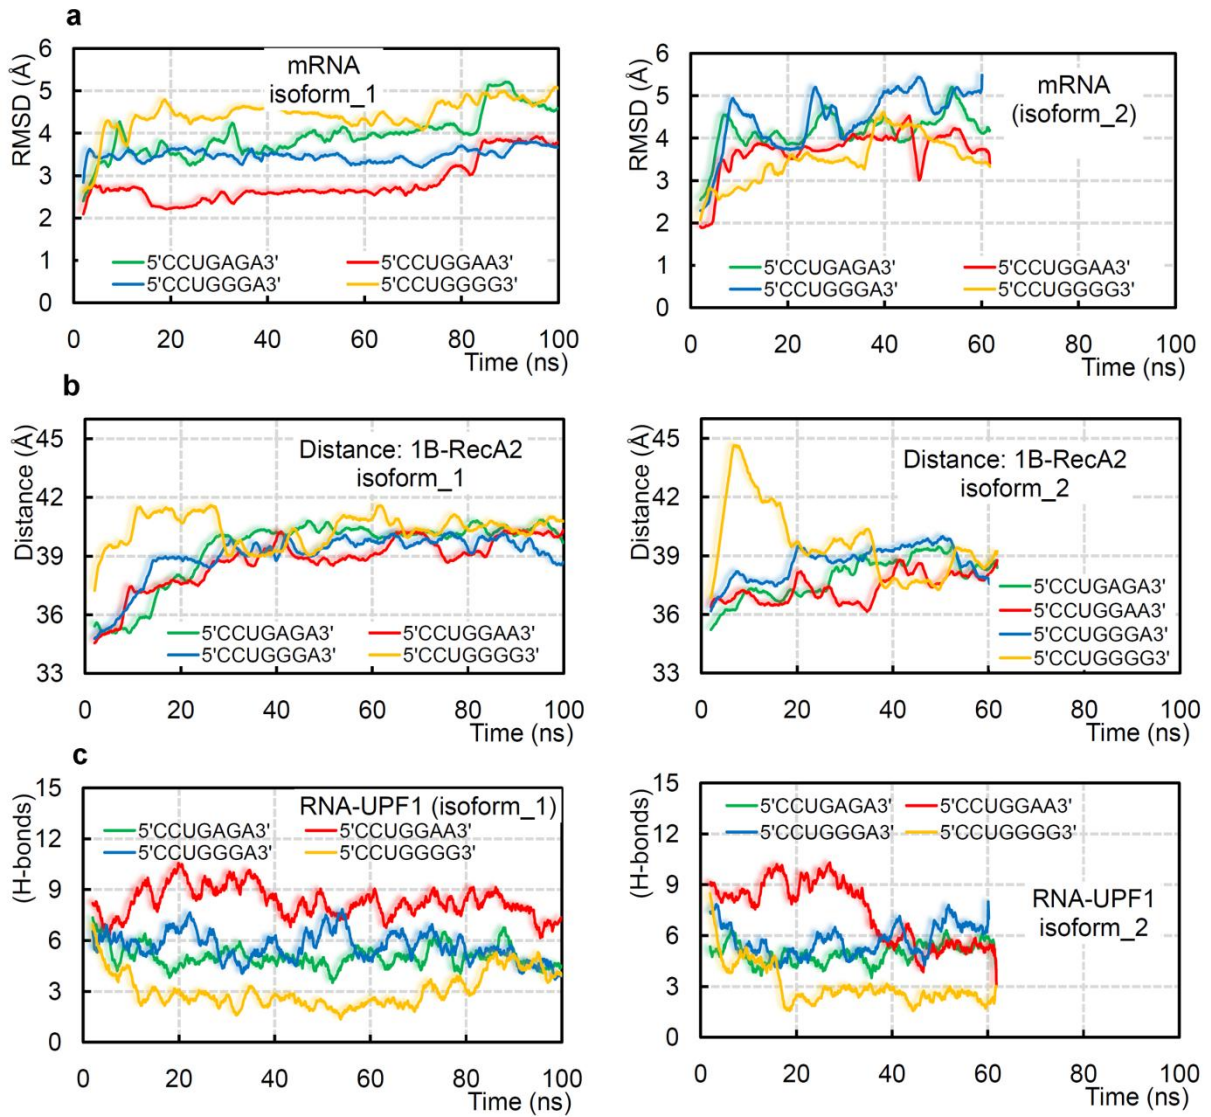

**Figure S2.** Both isoforms of UPF1 investigated in the presence of GC-rich mRNA motifs (5'-CCUGGGG-3', 5'-CCUGGGA-3', 5'-CCUGGAA-3', and 5'-CCUGAGA-3'). **(a)** Root-mean-square deviation (RMSD) of atomic positions (excluding hydrogen atoms) for GC-rich mRNA motifs in the presence of UPF1. **(b)** The distance centre of mass computed between 1B and RecA2 domains of UPF1 isoform\_1 when complexed with a GC-rich mRNA motif system. **(c)** The UPF1-mRNA intermolecular hydrogen bond interactions. For UPF1 isoform\_1, the MD simulation was performed for 100 ns and for UPF1 isoform\_2 the MD simulation was performed for ~60 ns. During this MDS time frame, it was observed that the UPF1 protein system has reached the equilibrium state in both UPF1 isoforms (Figure S3).

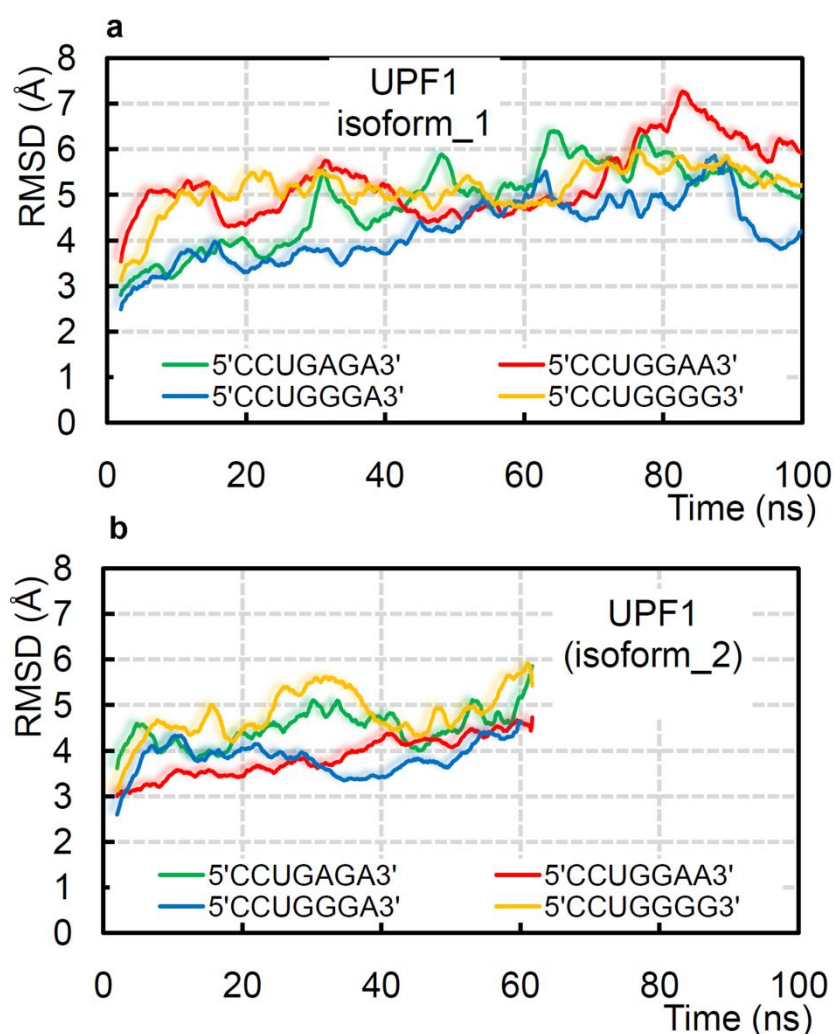

**Figure S3.** Root-mean-square deviation (RMSD) of atomic positions (excluding hydrogen atoms) for the UPF1 protein in presence of GC-rich mRNA motifs. **(a)** UPF1 isoform\_1 in the presence of different GC-rich mRNA motifs. **(b)** UPF1 isoform\_2 in the presence of different GC-rich mRNA motifs. For UPF1 isoform\_1, the MD simulation was performed for 100 ns and for UPF1 isoform\_2 the MD simulation was performed for ~60 ns. During this time frame it was observed that the UPF1 protein system has reached the equilibrium state in both UPF1 isoforms.

### **Movies attached as a separate file:**

**Video S1.** The 'closed conformation' between 1B-RecA2 domains acquired by the UPF1 (isoform\_1) with poly(U) mRNA motif during the 100 ns molecular dynamics. The poly(U) mRNA forming a 4-stack pattern with UPF1 (isoform\_1) is highlighted. Color Scheme: mRNA is shown in red color, domain 1B in orange, and RecA2 domain in blue.

**Video S2.** The 'open conformation' between 1B-RecA2 domains acquired by the UPF1 (isoform\_2) with poly(U) mRNA motif during the 100 ns molecular dynamics. Color Scheme: mRNA is shown in red color, domain 1B in orange, and RecA2 domain in blue.

**Video S3.** Mutated UPF1<sub>P533T</sub> (isoform\_1) system lacks the stacking pattern in poly(U) mRNA motif, resulting to an 'open conformation' between 1B and RecA2 domains during the 100 ns molecular dynamics. Color Scheme: mutated residue UPF1<sub>P533T</sub> in green, mRNA is shown in red color, domain 1B in orange, and RecA2 domain in blue.
